# Supplementary material for: Hemodynamic management of critically ill burn patients: an international survey
Source: Springer Nature journal article supplement (doi:10.1186/s13054-018-2129-3), 2018-08-15
Supplement: MOESM1 [file 16052200]

# **Hemodynamic management of critically ill burn patients: An International survey**

## **1) Characteristics of your hospital:**

- University hospital
- Public community hospital
- Private hospital
- Exclusive burn center
- Other, please specify: .....

## **2) Characteristics of your intensive care unit (ICU):**

- Medical ICU
- Surgical ICU
- Mixed ICU
- Intensive care burn unit

## **3) Annual number of burns patients treated in the ICU (approximatively):**

- $\geq 500$  patients
- 200-500 patients
- 100-200 patients
- 50-100 patients
- $< 50$  patients

**4) Total number of ICU beds (do not include medium care beds):**

- > 20 beds
- 16-20 beds
- 11-15 beds
- 6-10 beds
- ≤ 5 beds

**5) Number of ICU Beds devoted to burns patients (do not include medium care beds):**

- > 20 beds
- 16-20 beds
- 11-15 beds
- 6-10 beds
- ≤ 5 beds

**6) Your burned patients are:**

- Only Adults
- Both children and adults
- Only children

**7) Your main specialty (specialties) is (are): (More than one answer is possible)**

- Intensive care

- Anesthesiology
- Surgery
- Other, please specify: .....

**8) In which country do you work?**

.....

**9) Experience in treating burn patients**

- < 2 years
- Between 2 and 5 years
- >5 years

**10) Do you work full time with burns patients?**

- Yes
- No

**11) Do you use a protocol for fluid resuscitation for burns patients in your unit?**

- Yes
- No

**12) Which formula do you use to start volume therapy on admission in your burn patients?**

- Classical Parkland formula (4ml/Kg/% TBSA)
- Modified Parkland formula (2ml/Kg/% TBSA)
- Other formula, please specify: .....
- I do not use any formula

**13) Do you routinely increase fluid volume resuscitation in the case of inhalation injury?**

- Yes  No

**14) What parameters do you usually use to guide your volume therapy in severely burn patients in your unit? (In descending order of importance n°.....) (If you do not use any of them, leave it unchecked)**

- Urine output (n°.....)
- Mean arterial pressure (MAP) (n°.....)
- Central venous pressure/ Right atrial pressure (n°.....)
- Pulmonary capillary wedge pressure (PCWP) (n°.....)
- Global end diastolic volume (GEDV) / Intrathoracic blood volume (ITBV) (n°.....)
- Cardiac output (n°.....)
- Plasma lactate levels (n°.....)
- Plasma base deficit (n°.....)
- Central or mixed venous oximetry (ScvO<sub>2</sub> or SvO<sub>2</sub>) (n°.....)
- Venous-to-arterial carbon dioxide difference (PCO<sub>2</sub> gap) (n°.....)
- Pulse pressure variation (PPV) / Stroke volume variation (SVV) (n°.....)
- Echocardiography based parameters (n°.....)
- Skin mottling (n°.....)
- Extravascular lung water (EVLW) (n°.....)
- Other, please specify: ..... (n°.....)

**15) Do you usually (> 50% of cases) monitor cardiac output in the first 48 hours after admission in your severe burn patients?**

- Yes  No

**16) If yes, which technique do you use to monitor cardiac output continuously? (More than one answer is possible)**

- Oesophageal doppler probe  
 Transpulmonary thermodilution  
 Pulse contour analysis  
 Pulmonary artery catheter  
 Other, please specify: .....

**17) Do you use echocardiography to guide fluid resuscitation in your severe burn patients?**

- Yes  No

**18) If yes, do you use: (More than one answer is possible)**

- Transthoracic Echocardiography  Transesophageal Echocardiography  Both

**19) Which crystalloids do you use for the primary resuscitation in the first 48 hours?**

|           |                                          |                                    |                                       |                                        |                                           |
|-----------|------------------------------------------|------------------------------------|---------------------------------------|----------------------------------------|-------------------------------------------|
| NaCl 0.9% | 1) Almost never <input type="checkbox"/> | 2) Rarely <input type="checkbox"/> | 3) Sometimes <input type="checkbox"/> | 4) Frequently <input type="checkbox"/> | 5) Almost always <input type="checkbox"/> |
|-----------|------------------------------------------|------------------------------------|---------------------------------------|----------------------------------------|-------------------------------------------|

|                                        |                                                 |                                           |                                              |                                               |                                                  |
|----------------------------------------|-------------------------------------------------|-------------------------------------------|----------------------------------------------|-----------------------------------------------|--------------------------------------------------|
| <b>Ringer's Lactate</b>                | <b>1) Almost never</b> <input type="checkbox"/> | <b>2) Rarely</b> <input type="checkbox"/> | <b>3) Sometimes</b> <input type="checkbox"/> | <b>4) Frequently</b> <input type="checkbox"/> | <b>5) Almost always</b> <input type="checkbox"/> |
| <b>Plasma-Lyte®</b>                    | <b>1) Almost never</b> <input type="checkbox"/> | <b>2) Rarely</b> <input type="checkbox"/> | <b>3) Sometimes</b> <input type="checkbox"/> | <b>4) Frequently</b> <input type="checkbox"/> | <b>5) Almost always</b> <input type="checkbox"/> |
| <b>Isofundine®</b>                     | <b>1) Almost never</b> <input type="checkbox"/> | <b>2) Rarely</b> <input type="checkbox"/> | <b>3) Sometimes</b> <input type="checkbox"/> | <b>4) Frequently</b> <input type="checkbox"/> | <b>5) Almost always</b> <input type="checkbox"/> |
| <b>Other, please specify:</b><br>..... | <b>1) Almost never</b> <input type="checkbox"/> | <b>2) Rarely</b> <input type="checkbox"/> | <b>3) Sometimes</b> <input type="checkbox"/> | <b>4) Frequently</b> <input type="checkbox"/> | <b>5) Almost always</b> <input type="checkbox"/> |

Almost never (0 to 20 %), 2) Rarely (21 to 40%), 3) Sometimes (41 to 60%), 4) Frequently (61 to 80%), 5) Almost always (81 to 100%)

**20) Do you use colloids?**

|                                                 |                                           |                                              |                                               |                                                  |
|-------------------------------------------------|-------------------------------------------|----------------------------------------------|-----------------------------------------------|--------------------------------------------------|
| <b>1) Almost never</b> <input type="checkbox"/> | <b>2) Rarely</b> <input type="checkbox"/> | <b>3) Sometimes</b> <input type="checkbox"/> | <b>4) Frequently</b> <input type="checkbox"/> | <b>5) Almost always</b> <input type="checkbox"/> |
|-------------------------------------------------|-------------------------------------------|----------------------------------------------|-----------------------------------------------|--------------------------------------------------|

Almost never (0 to 20 %), 2) Rarely (21 to 40%), 3) Sometimes (41 to 60%), 4) Frequently (61 to 80%), 5) Almost always (81 to 100%)

**21) Which colloids do you use for the primary resuscitation in the first 48 hours?**

|            |                                                 |                                           |                                              |                                               |                                                  |
|------------|-------------------------------------------------|-------------------------------------------|----------------------------------------------|-----------------------------------------------|--------------------------------------------------|
| <b>HES</b> | <b>1) Almost never</b> <input type="checkbox"/> | <b>2) Rarely</b> <input type="checkbox"/> | <b>3) Sometimes</b> <input type="checkbox"/> | <b>4) Frequently</b> <input type="checkbox"/> | <b>5) Almost always</b> <input type="checkbox"/> |
|------------|-------------------------------------------------|-------------------------------------------|----------------------------------------------|-----------------------------------------------|--------------------------------------------------|

|                            |                                                 |                                           |                                              |                                               |                                                  |
|----------------------------|-------------------------------------------------|-------------------------------------------|----------------------------------------------|-----------------------------------------------|--------------------------------------------------|
| <b>Gelatins</b>            | <b>1) Almost never</b> <input type="checkbox"/> | <b>2) Rarely</b> <input type="checkbox"/> | <b>3) Sometimes</b> <input type="checkbox"/> | <b>4) Frequently</b> <input type="checkbox"/> | <b>5) Almost always</b> <input type="checkbox"/> |
| <b>Dextrans</b>            | <b>1) Almost never</b> <input type="checkbox"/> | <b>2) Rarely</b> <input type="checkbox"/> | <b>3) Sometimes</b> <input type="checkbox"/> | <b>4) Frequently</b> <input type="checkbox"/> | <b>5) Almost always</b> <input type="checkbox"/> |
| <b>Albumin 20%</b>         | <b>1) Almost never</b> <input type="checkbox"/> | <b>2) Rarely</b> <input type="checkbox"/> | <b>3) Sometimes</b> <input type="checkbox"/> | <b>4) Frequently</b> <input type="checkbox"/> | <b>5) Almost always</b> <input type="checkbox"/> |
| <b>Albumin 5%</b>          | <b>1) Almost never</b> <input type="checkbox"/> | <b>2) Rarely</b> <input type="checkbox"/> | <b>3) Sometimes</b> <input type="checkbox"/> | <b>4) Frequently</b> <input type="checkbox"/> | <b>5) Almost always</b> <input type="checkbox"/> |
| <b>Fresh frozen plasma</b> | <b>1) Almost never</b> <input type="checkbox"/> | <b>2) Rarely</b> <input type="checkbox"/> | <b>3) Sometimes</b> <input type="checkbox"/> | <b>4) Frequently</b> <input type="checkbox"/> | <b>5) Almost always</b> <input type="checkbox"/> |

**HES= Hydroxyethylstarches**

**Almost never (0 to 20 %), 2) Rarely (21 to 40%), 3) Sometimes (41 to 60%), 4) Frequently (61 to 80%), 5) Almost always (81 to 100%)**

**22) If you use colloids, how long do you wait before colloid infusion initiation?**

- 6-8 hours after burn injury
- 12 hours after burn injury
- 24 hours after burn injury

**23) If you use colloids, what are the triggers to initiate colloid infusion? (More than one answer is possible)**

- Systematically 6-8 hours after burn injury
- Fixed total burned surface area (e.g. TBSA > 30%)
- Persistent hypotension (MAP < 65 mmHg)

- High cristalloid volume requirement
- Acute respiratory distress syndrome (ARDS)
- Low plasma albumin levels (< 25 g/L)
- Inhalation injury
- Decreased urine output (< 0.5 ml/Kg/h)
- Other: .....

**24) Do you use adjunctive therapies to reduce volume administration in the first 48 hours after burn injury? (More than one answer is possible)**

- I use vasopressors early
- I use high dose Ascorbic acid (Vitamin C)
- I use early skin grafting surgery (<48 hours)
- I use corticoids
- Other, please specify: .....

**26) What is your first line vasopressor in the initial treatment of your severe burn patients?**

- Dopamine
- Norepinephrine
- Epinephrine
- Phenylephrine
- Vasopressin
- Metaraminol
- Other: .....



**27) Which MAP do you generally target in a young severely burned patient without comorbidities?**

- 60 mmHg
- 65 mmHg
- 70 mmHg
- 75 mmHg

**28) Which Cardiac index (CI) do you generally target?**

- 2-2.5 L/min/m<sup>2</sup>
- 2.5-3 L/min/m<sup>2</sup>
- 3-3.5 L/min/m<sup>2</sup>
- > 3.5 L/min/m<sup>2</sup>
- I consider CI variations rather than a specific number

**30) Do you use vasodilators in the first 24 hours after burn injury?**

|                                          |                                    |                                       |                                        |                                           |
|------------------------------------------|------------------------------------|---------------------------------------|----------------------------------------|-------------------------------------------|
| 1) Almost never <input type="checkbox"/> | 2) Rarely <input type="checkbox"/> | 3) Sometimes <input type="checkbox"/> | 4) Frequently <input type="checkbox"/> | 5) Almost always <input type="checkbox"/> |
|------------------------------------------|------------------------------------|---------------------------------------|----------------------------------------|-------------------------------------------|

Almost never (0 to 20 %), 2) Rarely (21 to 40%), 3) Sometimes (41 to 60%), 4) Frequently (61 to 80%), 5) Almost always (81 to 100%)

**31) If yes, which vasodilators do you use for the primary resuscitation in the first 24 hours?**

- Nitroglycerin
- Dobutamine
- Enoximone
- Prostacyclin
- pentoxifylline,
- Other: .....
