# Supplementary material for: Hemodynamic management of critically ill burn patients: an international survey
Source: Springer Nature journal article supplement (doi:10.1186/s13054-018-2129-3), 2018-08-15
Supplement: MOESM2 [file 16052200]

## Additional file 2 Comparison of participants' responses between burn centers and non-specialized centers

|                                                                | Respondents of non-specialized centers | Respondents of burn centers | p      |
|----------------------------------------------------------------|----------------------------------------|-----------------------------|--------|
| <b>Use of classical Parkland, n (%)</b>                        | 52/89 (58%)                            | 18/37 (48%)                 | 0.31   |
| <b>Usually monitor CO (&gt;50%) in the first 48 hrs, n (%)</b> | 43/130 (33%)                           | 27/41 (65%)                 | 0.001  |
| <b>Frequently or almost always use colloids, n (%)</b>         | 15/80 (19%)                            | 22/37 (59%)                 | <0.001 |
| <b>Frequently or almost always use Albumin, n (%)</b>          | 39/76 (51%)                            | 26/36 (72%)                 | 0.03   |
| <b>Early use of vasopressors, n (%)</b>                        | 68/130 (52%)                           | 25/41 (61%)                 | 0.001  |

CO cardiac output, *n* number of respondents per group. The results are reported as numbers and percentages (%). The chi2 and Fischer tests were used as appropriate (p<0.05).
